# Supplementary material for: Smartphone Application for Smoking Cessation (Quit with US): A Randomized Controlled Trial among Young Adult Light Smokers in Thailand
Source: MDPI journal article supplement (doi:10.3390/ijerph19148265), 2022-07-06
Supplement: s1 [file s1]

**Table S2.** Primary outcome in the Quit with US trial by separating daily and nondaily smokers

| Exhaled CO<br>concentration level<br>verified<br>7-day point prevalence<br>abstinence <sup>1</sup> | Daily smokers                 |                          |                     |          | Nondaily smokers              |                          |                     |          |
|----------------------------------------------------------------------------------------------------|-------------------------------|--------------------------|---------------------|----------|-------------------------------|--------------------------|---------------------|----------|
|                                                                                                    | Quit with<br>US, <i>n</i> (%) | Control,<br><i>n</i> (%) | RR (95% CI)         | <i>p</i> | Quit with<br>US, <i>n</i> (%) | Control,<br><i>n</i> (%) | RR (95% CI)         | <i>p</i> |
| <b>Intention-to-treat</b>                                                                          |                               |                          |                     |          |                               |                          |                     |          |
| <b>analysis</b>                                                                                    | ( <i>n</i> = 75)              | ( <i>n</i> = 83)         |                     |          | ( <i>n</i> = 62)              | ( <i>n</i> = 53)         |                     |          |
| Abstainers                                                                                         | 28 (37.3)                     | 8 (9.6)                  | 3.87 (1.88 to 7.96) | <0.001   | 52 (83.9)                     | 34 (64.2)                | 1.31 (1.04 to 1.64) | 0.018    |
| Nonabstainers                                                                                      | 47 (62.7)                     | 75 (90.4)                | 1.00                |          | 10 (16.1)                     | 19 (35.8)                | 1.00                |          |
| <b>Per protocol analysis</b>                                                                       | ( <i>n</i> = 64)              | ( <i>n</i> = 74)         |                     |          | ( <i>n</i> = 55)              | ( <i>n</i> = 45)         |                     |          |
| Abstainers                                                                                         | 28 (43.8)                     | 8 (10.8)                 | 4.05 (1.99 to 8.24) | <0.001   | 52 (94.6)                     | 34 (75.6)                | 1.25 (1.05 to 1.49) | 0.009    |
| Nonabstainers                                                                                      | 36 (56.2)                     | 66 (89.2)                | 1.00                |          | 3 (5.4)                       | 11 (24.4)                | 1.00                |          |

RR, risk ratio; CI, confidence intervals; <sup>1</sup> Measured by a self-report of continuous abstinence from smoking in the previous 7 consecutive days plus an exhaled CO concentration level of ≤6 ppm.
