# Supplementary material for: Smartphone Application for Smoking Cessation (Quit with US): A Randomized Controlled Trial among Young Adult Light Smokers in Thailand
Source: MDPI journal article supplement (doi:10.3390/ijerph19148265), 2022-07-06
Supplement: s1 [file s1]

**Table S3.** Satisfaction in Quit with US of 119 participants in the intervention group

| Variable                                                                                    | Quit with US,<br>mean (SD) <sup>1</sup> |
|---------------------------------------------------------------------------------------------|-----------------------------------------|
| <b>Satisfaction with the overall design</b>                                                 | <b>4.06 (0.82)</b>                      |
| 1. Font styles and sizes were appropriate and obvious.                                      | 4.33 (0.64)                             |
| 2. Menu icons could convey a clear understanding of their functions.                        | 4.28 (0.70)                             |
| 3. Illustrations and graphics were attractive, interesting, and luminous.                   | 4.26 (0.69)                             |
| 4. Component colors on the screen were appropriate and attractive.                          | 4.23 (0.62)                             |
| 5. The smartphone app was user-friendly.                                                    | 4.13 (0.85)                             |
| 6. The position arrangement of the components on the screen was appropriate and attractive. | 4.08 (0.68)                             |
| 7. Number of menu options were appropriate for use.                                         | 4.05 (0.82)                             |
| 8. Buttons were appropriately arranged and user-friendly.                                   | 4.03 (0.87)                             |
| 9. The smartphone app runs smoothly without any technical glitch.                           | 3.17 (0.89)                             |
| <b>Satisfaction with the overall content</b>                                                | <b>4.16 (0.80)</b>                      |
| 1. Displayed presentation of records on users' progress in smoking cessation.               | 4.35 (0.72)                             |
| 2. Advice on smoking cessation methods.                                                     | 4.26 (0.78)                             |
| 3. Self-setting goals in quitting smoking.                                                  | 4.24 (0.67)                             |
| 4. Displayed encouraging messages about smoking cessation.                                  | 4.22 (0.81)                             |
| 5. Calculated money saved from smoking cessation.                                           | 4.19 (0.90)                             |
| 6. Information about benefits of smoking cessation to the body.                             | 4.13 (0.82)                             |
| 7. Self-set an initial date for smoking cessation.                                          | 4.13 (0.79)                             |
| 8. Suggested coping methods when having symptoms after smoking cessation.                   | 4.11 (0.72)                             |
| 9. Information about drawbacks of smoking to the body.                                      | 4.09 (0.87)                             |
| 10. Suggested coping methods with a desire to smoke or unintentional smoking.               | 4.08 (0.78)                             |
| 11. A list of questions and answers provided by pharmacists.                                | 3.95 (0.86)                             |

<sup>1</sup> The mean scores ranged between 1 and 5, with high scores conveying better satisfaction.
