# Supplementary material for: Smartphone Application for Smoking Cessation (Quit with US): A Randomized Controlled Trial among Young Adult Light Smokers in Thailand
Source: MDPI journal article supplement (doi:10.3390/ijerph19148265), 2022-07-06
Supplement: s1 [file s1]

**Table S4** Confidence in Quit with US of 119 participants in the intervention group

| Variable                                                                                                                    | Quit with US,<br>mean (SD) <sup>1</sup> |
|-----------------------------------------------------------------------------------------------------------------------------|-----------------------------------------|
| <b>Confidence in the overall use</b>                                                                                        | <b>4.33 (0.74)</b>                      |
| 1. This smartphone app was considered a safe smoking cessation method.                                                      | 4.55 (0.63)                             |
| 2. This smartphone app provided accurate information about smoking cessation.                                               | 4.55 (0.55)                             |
| 3. Using this smartphone app as a supplement to other smoking cessation methods could promote successful smoking cessation. | 4.54 (0.61)                             |
| 4. I would suggest those who desire to quit smoking to use this smartphone app.                                             | 4.48 (0.66)                             |
| 5. This smartphone app enabled me to receive suggestions and assistance at my convenience.                                  | 4.25 (0.74)                             |
| 6. This smartphone app was considered a financially favorable method when compared with other smoking cessation methods.    | 4.17 (0.84)                             |
| 7. This smartphone app made me feel confident of my ability to successfully quit smoking.                                   | 4.04 (0.78)                             |
| 8. I was confident that this smartphone app would assist me to successfully quit smoking.                                   | 4.02 (0.81)                             |

<sup>1</sup> The mean scores ranged between 1 and 5, with high scores conveying better confidence.
