# Supplementary material for: Smartphone Application for Smoking Cessation (Quit with US): A Randomized Controlled Trial among Young Adult Light Smokers in Thailand
Source: Int J Environ Res Public Health. 2022 Jul 6;19(14):8265. doi: 10.3390/ijerph19148265 (PMC9321212; doi:10.3390/ijerph19148265)
Supplement: Supplementary file 1 [file ijerph-19-08265-s001.zip]

Archive with 4 entries (4 files):
- ijerph-1754967-Table S1 for Revised Manuscript Round 1 (21-6-2565).pdf
- ijerph-1754967-Table S2 for Revised Manuscript Round 1 (21-6-2565).pdf
- ijerph-1754967-Table S3 for Revised Manuscript Round 1 (21-6-2565).pdf
- ijerph-1754967-Table S4 for Revised Manuscript Round 1 (21-6-2565).pdf
